# Supplementary material for: Exploring the Diversity and Aromatic Hydrocarbon Degrading Potential of Epiphytic Fungi on Hornbeams from Chronically Polluted Areas
Source: MDPI journal article supplement (doi:10.3390/jof7110972), 2021-11-16
Supplement: s1 [file s1]

## Supplementary material

**Supplementary Table 1** Shotgun metagenome sequencing total number of reads, total number of classified fungal and bacterial reads per sample. Their means and SD are shown. Per each location (Bóbrka, Białowieża and Warsaw) six phyllosphere samples were sequenced.

|                     | Total<br>number<br>of reads | Total<br>number of<br>classified<br>fungal<br>reads | Total<br>number of<br>classified<br>bacterial<br>reads | Fungi     |          | Bacteria   |           |
|---------------------|-----------------------------|-----------------------------------------------------|--------------------------------------------------------|-----------|----------|------------|-----------|
|                     |                             |                                                     |                                                        | mean      | SD       | mean       | SD        |
| <b>Bóbrka 1</b>     | 305,400                     | 16,733                                              | 285,818                                                | 14,106.00 | 7,097.73 | 340,110.50 | 64,229.54 |
| <b>Bóbrka 2</b>     | 413,132                     | 9,075                                               | 400,744                                                |           |          |            |           |
| <b>Bóbrka 3</b>     | 442,307                     | 7,896                                               | 42,854                                                 |           |          |            |           |
| <b>Bóbrka 4</b>     | 330,779                     | 21,241                                              | 304,252                                                |           |          |            |           |
| <b>Bóbrka 5</b>     | 297,404                     | 21,870                                              | 271,924                                                |           |          |            |           |
| <b>Bóbrka 6</b>     | 349,848                     | 6,809                                               | 339,359                                                |           |          |            |           |
| <b>Białowieża 1</b> | 485,062                     | 5,536                                               | 475,564                                                | 4,449.00  | 1,011.79 | 426,475.33 | 77,314.96 |
| <b>Białowieża 2</b> | 465,702                     | 4,254                                               | 458,499                                                |           |          |            |           |
| <b>Białowieża 3</b> | 493,303                     | 2,903                                               | 487,623                                                |           |          |            |           |
| <b>Białowieża 4</b> | 481,196                     | 4,468                                               | 473,548                                                |           |          |            |           |
| <b>Białowieża 5</b> | 335,726                     | 4,478                                               | 328,274                                                |           |          |            |           |
| <b>Białowieża 6</b> | 332,377                     | 4,160                                               | 322,688                                                |           |          |            |           |
| <b>Warsaw 1</b>     | 419,482                     | 12,590                                              | 266,920                                                | 5,704.17  | 4,734.63 | 336,557.33 | 62,557.18 |
| <b>Warsaw 2</b>     | 386,176                     | 11,254                                              | 404,347                                                |           |          |            |           |
| <b>Warsaw 3</b>     | 259,786                     | 3,409                                               | 381,093                                                |           |          |            |           |
| <b>Warsaw 4</b>     | 374,014                     | 4,332                                               | 251,606                                                |           |          |            |           |
| <b>Warsaw 5</b>     | 351,473                     | 10,837                                              | 366,668                                                |           |          |            |           |
| <b>Warsaw 6</b>     | 272,565                     | 8,245                                               | 266,920                                                |           |          |            |           |

**Supplementary Table 2.** Overview cultivated epiphytic fungi from Bóbrka and Warsaw.

| Site          | Class           | Genus                | Species                | Strains                |
|---------------|-----------------|----------------------|------------------------|------------------------|
| <b>Bóbrka</b> | Dothideomycetes | <i>Alternaria</i>    | <i>alternata</i>       | AT37; AT11; AT14; AT28 |
|               | Dothideomycetes | <i>Cladosporium</i>  | sp.                    | AT23; AT33             |
|               | Sordariomycetes | <i>Fusarium</i>      | <i>lateritium</i>      | AT6                    |
|               | Sordariomycetes | <i>Fusarium</i>      | <i>sporotrichiodes</i> | AT8; AT11; AT35        |
|               | Sordariomycetes | <i>Fusarium</i>      | <i>avenaceum</i>       | AT5; AT17; AT18; AT21  |
|               | Sordariomycetes | <i>Fusarium</i>      | <i>proliferatum</i>    | AT22                   |
|               | Dothideomycetes | <i>Lophiostoma</i>   | sp.                    | AT37                   |
|               | Eurotiomycetes  | <i>Penicillium</i>   | <i>citrinum</i>        | AT10                   |
|               | Dothideomycetes | <i>Phoma</i>         | <i>herbarum</i>        | AT15; AT16             |
|               | Sordariomycetes | <i>Sarocladium</i>   | <i>strictum</i>        | AT4                    |
| <b>Warsaw</b> | Sordariomycetes | <i>Acremonium</i>    | <i>frucatum</i>        | AT3                    |
|               | Dothideomycetes | <i>Aureobasidium</i> | <i>pullulans</i>       | AT2; AT20; AT25        |
|               | Dothideomycetes | <i>Cladosporium</i>  | sp.                    | AT1                    |

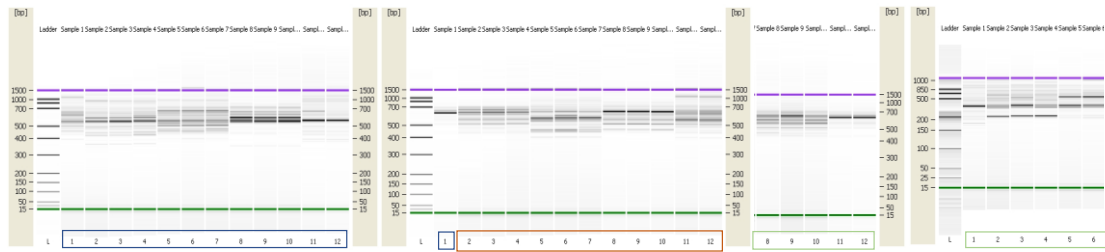

**Supplementary Figure 1.** Gel-like image generated by ARISA bioanalyzer to analyse the fungal diversity at the three sites (Warsaw, Bóbrka and Białowieża. The first column (L) shows the reference DNA ladder. Base pair sizes are indicated next to the ladder. The lowermost (15 bp) and the uppermost (1500 bp) bands represent the markers used to align the ladder data with data from the sample wells.
